# Supplementary material for: Genome-Wide Variation Patterns Uncover the Origin and Selection in Cultivated Ginseng (Panax ginseng Meyer)
Source: PubMed Central journal article supplement — Genome Biol Evol. 2017 Aug 24;9(9):2159–69. doi: 10.1093/gbe/evx160 (PMC5737880; doi:10.1093/gbe/evx160), 2017-08-24
Supplement: evx160_suppfig_s1.pdf [file evx160_suppfig_s1.pdf]

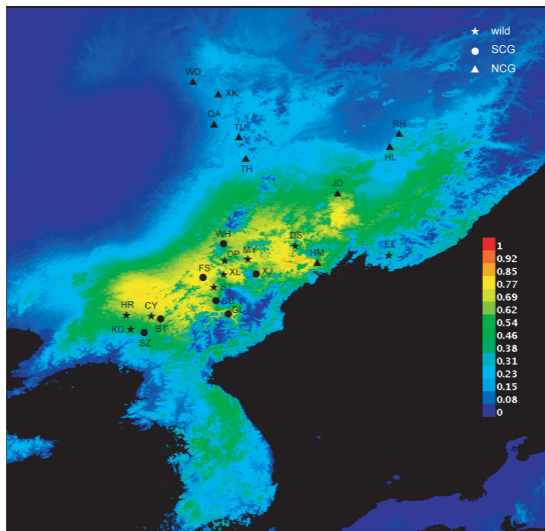

**Figure S1.** Ecological niche modeling and geographic locations of the 30 wild and cultivated ginseng used in this study. Star, cycle and triangle are the wild ginseng, SCG and NCG groups. The wild ginseng accession EL was collected from the Nakhodka of Russian. Two GAOLI landrace accession (GL) were obtained from North and South Korea. BT and SZ are the landraces BIANLIAO and SHIZHU, respectively. The remaining cultivated ginseng accessions are the landrace COMMON ginseng. Warm and cold colors indicate predicted probability of suitable conditions. Red and blue colors suggest high and low probability of suitable conditions for *Panax ginseng*, respectively.
