# Supplementary material for: Genome-Wide Variation Patterns Uncover the Origin and Selection in Cultivated Ginseng (Panax ginseng Meyer)
Source: PubMed Central journal article supplement — Genome Biol Evol. 2017 Aug 24;9(9):2159–69. doi: 10.1093/gbe/evx160 (PMC5737880; doi:10.1093/gbe/evx160), 2017-08-24
Supplement: evx160_suppfig_s2.pdf [file evx160_suppfig_s2.pdf]

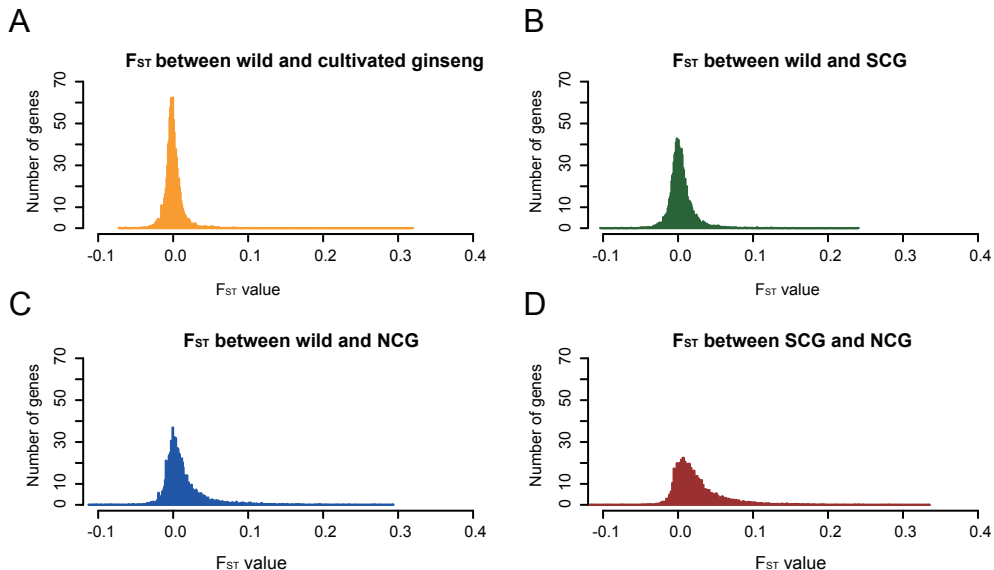

**Figure S2.** Genetic differentiation ( $F_{ST}$ ) for each of the 8,660 protein-coding genes between wild and cultivated ginseng.  $F_{ST}$  values for each gene between wild and all cultivated ginseng accessions (**A**), wild and SCG (**B**), wild and NCG (**C**) and SCG and NCG (**D**), respectively. X- and y-axis are the  $F_{ST}$  value of each gene and total number of genes within each unit. Negative values indicate no genetic differentiation at these genes.
