# Supplementary material for: Genome-Wide Variation Patterns Uncover the Origin and Selection in Cultivated Ginseng (Panax ginseng Meyer)
Source: PubMed Central journal article supplement — Genome Biol Evol. 2017 Aug 24;9(9):2159–69. doi: 10.1093/gbe/evx160 (PMC5737880; doi:10.1093/gbe/evx160), 2017-08-24
Supplement: evx160_suppfig_s3.pdf [file evx160_suppfig_s3.pdf]

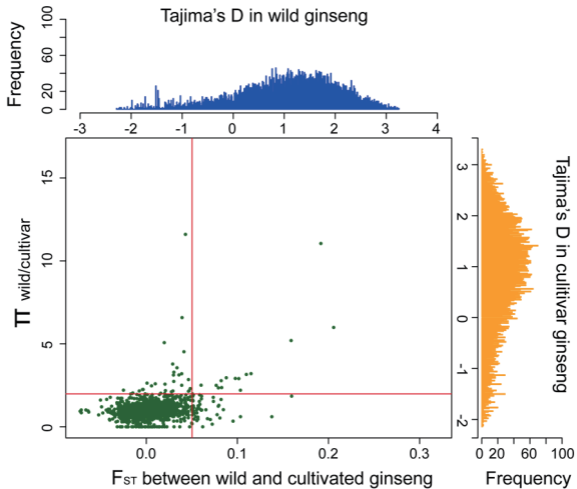

**Figure S3.** Identification of candidate genes that showed relatively lower nucleotide diversity ( $\pi$ ) in all cultivated ginseng accessions and high genetic differentiation ( $F_{ST}$ ) relative to wild ginseng. Red solid lines are the cutoff ( $\pi_{wild/SCG} > 2$ ;  $F_{ST} > 0.05$ ). Each green dot represents a single protein-coding gene. Barplot distributions of Tajima's D values are showed for wild and cultivated ginseng separately. X- and Y-axis are Tajima's D value and number of genes, respectively.
