# Supplementary material for: Genome-Wide Variation Patterns Uncover the Origin and Selection in Cultivated Ginseng (Panax ginseng Meyer)
Source: PubMed Central journal article supplement — Genome Biol Evol. 2017 Aug 24;9(9):2159–69. doi: 10.1093/gbe/evx160 (PMC5737880; doi:10.1093/gbe/evx160), 2017-08-24
Supplement: evx160_suppfig_s4.pdf [file evx160_suppfig_s4.pdf]

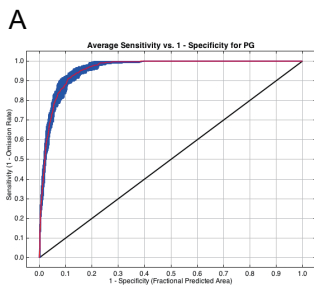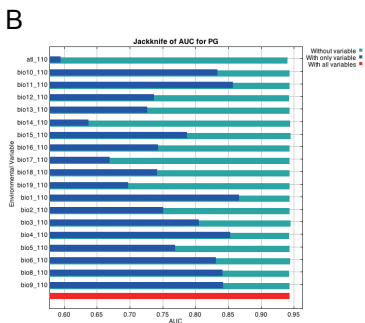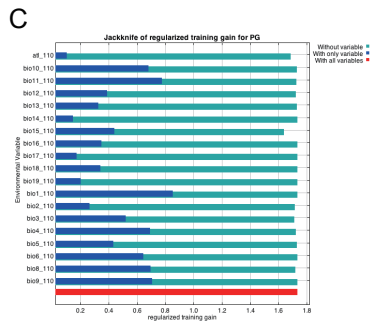

**Figure S4.** Ecological niche modeling and jackknife test of variable importance of *Panax ginseng*. **(A)** The receiver operating characteristic curve for *P. ginseng*. The average training AUC for the replicate runs is  $0.960 \pm 0.006$ ; **(B)** The jackknife test of AUC on test data; **(C)** Jackknife of regularized training gain. Values shown are averages over replicate runs. The 20 bioclimatic variables are: bio1, annual mean temperature; bio2, mean diurnal range (mean of monthly (max temp - min temp)); bio3, isothermality (bio2/bio7) ( $\times 100$ ); bio4, temperature seasonality (standard deviation  $\times 100$ ); bio5, max temperature of warmest month; bio6, min temperature of coldest month; bio7, temperature annual range (bio5-bio6); bio8, meant emperature of wettest quarter; bio9, mean temperature of driest quarter; bio10, mean temperature of warmest quarter; bio11, mean temperature of coldest quarter; bio12, annual precipitation; bio13, precipitation of wettest month; bio14, precipitation of driest month; bio15, precipitation seasonality (coefficient of variation); bio16, precipitation of wettest quarter; bio17, precipitation of driest quarter; bio18, precipitation of warmest quarter; bio19, precipitation of coldest quarter; alt, altitude layer. The number 110 following each of the 20 variables is the area code of northeastern Asia.
