# Supplementary material for: Genome-Wide Variation Patterns Uncover the Origin and Selection in Cultivated Ginseng (Panax ginseng Meyer)
Source: PubMed Central journal article supplement — Genome Biol Evol. 2017 Aug 24;9(9):2159–69. doi: 10.1093/gbe/evx160 (PMC5737880; doi:10.1093/gbe/evx160), 2017-08-24
Supplement: evx160_suppfig_s5.pdf [file evx160_suppfig_s5.pdf]

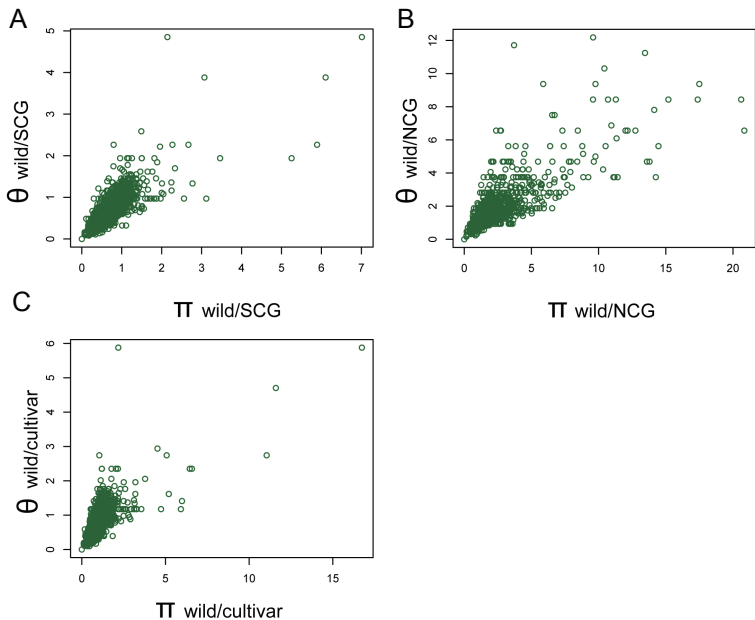

**Figure S5.** Ratio values of  $\pi$  and  $\theta$  between wild and SCG, NCG and all cultivated ginseng accessions. X- and y-axis represent  $\pi$  and  $\theta$  ratios between wild and SCG (A) wild and NCG (B), and wild and all cultivated ginseng accessions (C), respectively. Each cycle represents a single protein-coding gene.
